# Supplementary material for: Natural Killer Cell Receptor Genes in the Family Equidae: Not only Ly49
Source: PubMed Central journal article supplement (PMC3665701; doi:10.1371/journal.pone.0064736), 2013-05-28
Supplement: pone.0064736.s003.pdf [file pone.0064736.s003.pdf]

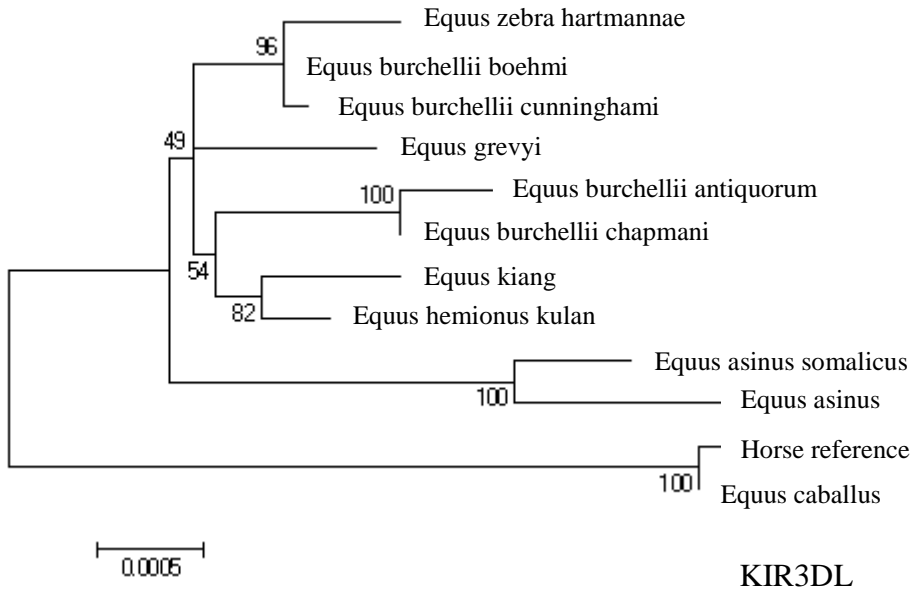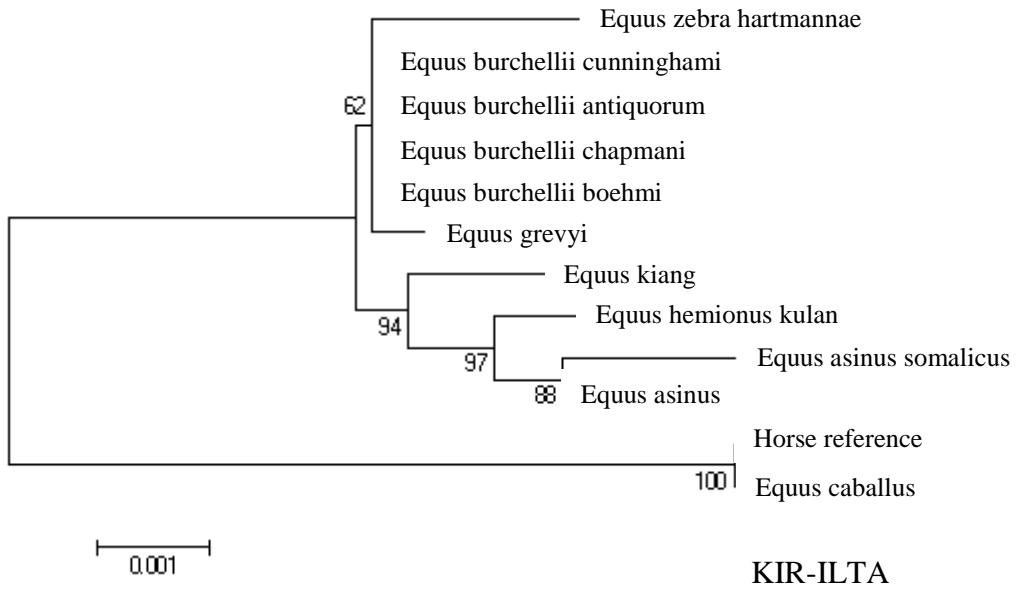

**Figure S3**
