# Supplementary material for: Natural Killer Cell Receptor Genes in the Family Equidae: Not only Ly49
Source: PubMed Central journal article supplement (PMC3665701; doi:10.1371/journal.pone.0064736), 2013-05-28
Supplement: pone.0064736.s004.pdf [file pone.0064736.s004.pdf]

**Table S1**

| Gene/fragment                           | 5'-3' sequences of primers forward/reverse                                | length of amplicon   | annealing temperature |
|-----------------------------------------|---------------------------------------------------------------------------|----------------------|-----------------------|
| <i>LY49</i><br>universal<br>5'UTR-exon2 | ACCTTGTTGTTGGGTCAGCT/<br>CAGAGRATCCCAAGAGTCACTAC                          | app.2950-<br>3200bp  | 65°C                  |
| <i>LY49B</i><br>exon 1                  | AGACATGAGCAATCARGAAGT/<br>TGTATATTCTAGTTACCGTCTAGTTATAAGT                 | 553 bp               | 61°C                  |
| <i>LY49C</i><br>exon 1                  | AGACATGAGCAATCARGAAGT/<br>ATTCATTAATTTGGAGAAATGGAGA                       | 305 bp               | 61°C                  |
| <i>LY49D</i><br>exon 1                  | AGACATGAGCAATCARGAAGT/<br>TTTGATTTCTCATTCTTTAAGACTTATG                    | 718 bp               | 61°C                  |
| <i>LY49E</i><br>exon 1                  | AGACATGAGCAATCARGAAGT/<br>GAGCAGGCCAAACTGTAATC                            | 422 bp               | 61°C                  |
| <i>LY49F</i><br>exon 1                  | AGACATGAGCAATCARGAAGT/<br>AACCTAGACGGCCAAAGCAG                            | 427 bp               | 61°C                  |
| <i>LY49</i><br>exon4-exon6              | TGGTCCTGTTGTGGAGTAAACTG/<br>according to gene; see exon 6 reverse primers | various<br>max.5,6kb | 60°C                  |
| <i>LY49B</i><br>exon 5                  | GGAAGGTTTTCTAGGAAGGAAG/<br>TCTTACCAGTGACGTCTGCTT                          | 377 bp               | 58°C                  |
| <i>LY49C</i><br>exon 5                  | AAGAGAAGGTTTTTTAGGAAGGAGT/<br>CTTATTCTTGCCAACGA ACTCTACT                  | 387 bp               | 61°C                  |
| <i>LY49D</i><br>exon 5                  | AGAGAAGGTTTTTTAGGAAGGAGG/<br>CGTATTCTTACCAATGACCTCTACCT                   | 389 bp               | 58°C                  |
| <i>LY49E</i><br>exon 5                  | AAGAGAAGGTTTTTTAGGAAGGAGT/<br>CTTATTCTTGCCAATGAACTCTACC                   | 388 bp               | 61°C                  |
| <i>LY49F</i><br>exon 5                  | GAGAGAAGGTTTTCTAGGAAGGAGA/<br>CTTATTCTTACCAATGACCTCTGCTTC                 | 388 bp               | 58°C                  |
| <i>LY49B</i><br>exon 6                  | GGTGTGATCAGGAGGCTGTTA/<br>AGGGCCATTAAAGAGATGGGA                           | 577 bp               | 61°C                  |
| <i>LY49C</i><br>exon 6                  | GGGTGTGATCAGAAGGCTGT/<br>CAGGGCCATTAAAGAGAAGAGC                           | 583 bp               | 61°C                  |
| <i>LY49D</i><br>exon 6                  | GTGTGATCAGGAGGCTGTG/<br>TTTCTCAGGGTCGTTAGAGAGT                            | 586 bp               | 61°C                  |
| <i>LY49E</i><br>exon 6                  | GGGTGTGATCAGAAGGCTGT/<br>CAGGGCCATTAAAGAGAAGGGC                           | 583 bp               | 61°C                  |
| <i>LY49F</i><br>exon 6                  | GGAAGATTATGGGTGTGATCAAT/<br>TTTGCAGGGTCATTAAAGAGAGG                       | 601 bp               | 61°C                  |
