# Supplementary material for: Natural Killer Cell Receptor Genes in the Family Equidae: Not only Ly49
Source: PubMed Central journal article supplement (PMC3665701; doi:10.1371/journal.pone.0064736), 2013-05-28
Supplement: pone.0064736.s006.pdf [file pone.0064736.s006.pdf]

**Table S3**

| <b>Name of sequence</b>             | <b>species</b>            | <b>accession numbers</b>     |
|-------------------------------------|---------------------------|------------------------------|
| <i>Mus musculus</i> KIR3DL1         | house mouse               | NP_808417.2; gi 125490384    |
| <i>Mus musculus</i> KIR3DL2         | house mouse               | NP_808416.1; gi 29244534     |
| <i>Rattus norvegicus</i>            | Norway rat                | NP_852144.1; gi 31324550     |
| <i>Cricetulus griseus</i>           | Chinese hamster           | XP_003511503.1; gi 354498804 |
| <i>Cavia porcellus</i>              | domestic guinea pig       | XP_003465608.1; gi 348559608 |
| <i>Bos taurus</i> KIR3DL1           | cattle                    | NP_852116.1; gi 32189324     |
| <i>Bos taurus</i> KIR3DL2           | cattle                    | NP_001091558.1; gi 148227982 |
| <i>Ovis aries</i> KIR2DL3           | sheep                     | XP_004022885.1; gi 426258575 |
| <i>Ovis aries</i> KIR3DL1-like      | sheep                     | XP_004015947.1; gi 426244270 |
| <i>Ovis aries</i> KIR3DL2-like      | sheep                     | XP_004015946.1; gi 426244268 |
| <i>Loxodonta africana</i>           | African savanna elephant  | XP_003406656.1; gi 344269639 |
| <i>Bos taurus</i> KIR2DL1           | cattle                    | AAP33624.1; gi 30466080      |
| <i>Sus scrofa</i> KIR2DL1           | pig                       | NP_001106689.1; gi 172073179 |
| <i>Halichoerus grypus</i>           | gray seal                 | ACN73230.1; gi 224980757     |
| <i>Phoca vitulina vitulina</i>      | harbor seal               | ACN73228.1; gi 224980753     |
| <i>Leptonychotes weddellii</i>      | Weddell seal              | ACN73224.1; gi 224980745     |
| <i>Zalophus californianus</i>       | California sea lion       | ACN78956.1; gi 225016054     |
| <i>Ailuropoda melanoleuca</i>       | giant panda               | XP_002926417.1; gi 301782005 |
| <i>Ceratotherium simum</i>          | white rhinoceros          | KC412056                     |
| <i>Rhinoceros unicornis</i>         | greater Indian rhinoceros | KC412055                     |
| <i>Equus caballus</i>               | horse                     | KC315949                     |
| <i>Equus asinus</i>                 | donkey                    | KC315957                     |
| <i>Equus asinus somalicus</i>       | Somali wild ass           | KC315956                     |
| <i>Equus hemionus kulan</i>         | kulan                     | KC315959                     |
| <i>Equus kiang</i>                  | kiang                     | KC315958                     |
| <i>Equus grevyi</i>                 | Grevy's zebra             | KC315950                     |
| <i>Equus zebra hartmannae</i>       | Hartmann's mountain zebra | KC315951                     |
| <i>Equus burchellii cunninghami</i> | plains zebra subspecies   | KC315955                     |
| <i>Equus burchellii chapmani</i>    | Chapman's zebra           | KC315954                     |
| <i>Equus burchellii boehmi</i>      | Grant's zebra             | KC315953                     |
| <i>Equus burchellii antiquorum</i>  | Damara zebra              | KC315952                     |
